# Supplementary material for: Hexagonal ordering of racemic Ni(ii) complexes in the interlayer space of a clay mineral
Source: Royal Society of Chemistry journal article supplement (doi:10.1039/d0cc04977h), 2020-01-01
Supplement: d0cc04977h1.pdf [file d0cc04977h1.pdf]

## Supporting Information

Hexagonal ordering of racemic Ni(II) complexes in the interlayer  
space of a clay mineral

Jun Yoshida,\* Kazunori Tateyama, Hidetaka Yuge, and Mitsuo Hara\*

## Materials and methods

All solvents employed were reagent grade. Sodium-montmorillonite clay (**Na-Mt**) was purchased from Kunimine Industries Co., Ltd as a specimen of the Clay Science Society of Japan (JCSS-3101). The elemental composition and cation-exchange capacity are  $(\text{Na}_{0.47}\text{Ca}_{0.04})(\text{Al}_{1.51}\text{Mg}_{0.35}\text{Fe}_{0.13})(\text{Si}_{3.78}\text{Al}_{0.22})\text{O}_{10}(\text{OH})_2$  and 1.19 meq per gram, respectively.  $[\text{Ni}(\text{phen})_3]\text{Cl}_2$  was prepared according to the reported procedure.<sup>1</sup> The intercalated and intersalated compounds of a montmorillonite clay with  $[\text{Ni}(\text{phen})_3]^{2+}$  were prepared by adding an aqueous solution of  $[\text{Ni}(\text{phen})_3]\text{Cl}_2$  into an aqueous suspension of **Na-Mt**. After the decantation, the suspension was filtered with a membrane filter. The precipitate was dried under air. The actual amount of adsorbed Ni complexes was determined by the UV-Vis spectra of the filtrate. The obtained adsorption isotherm is shown in Fig. S1.

UV-Vis spectra were recorded with V-570 (JASCO Corp.). Thermogravimetric (TG) analysis was performed with a Thermo plus EVO2 TG-DTA 8122 (Rigaku Corp.). FT-IR spectroscopy was performed with a JASCO FT/IR-4200 with an ATR unit (diamond, MicromATR Vision, Czitek). Micro-Raman spectroscopy was performed with a JASCO NRS-7200 using a 785nm laser. Before the measurements, the Raman shift was calibrated with a silicon substrate. One-dimensional X-ray diffraction was performed in reflection mode on an X-ray diffractometer SmartLab SE equipped with a 1D detector D/teX Ultra 250 (Rigaku Corp.) using Cu K $\alpha$  radiation ( $\lambda = 0.154$  nm), while two-dimensional XRD in transmission mode and GI-XRD was performed on an X-ray diffractometer FR-E equipped with a two-dimensional detector R-Axis IV (Rigaku Corp.) involving an imaging plate (Fujifilm Corp.) using Cu K $\alpha$  radiation ( $\lambda = 0.154$  nm).

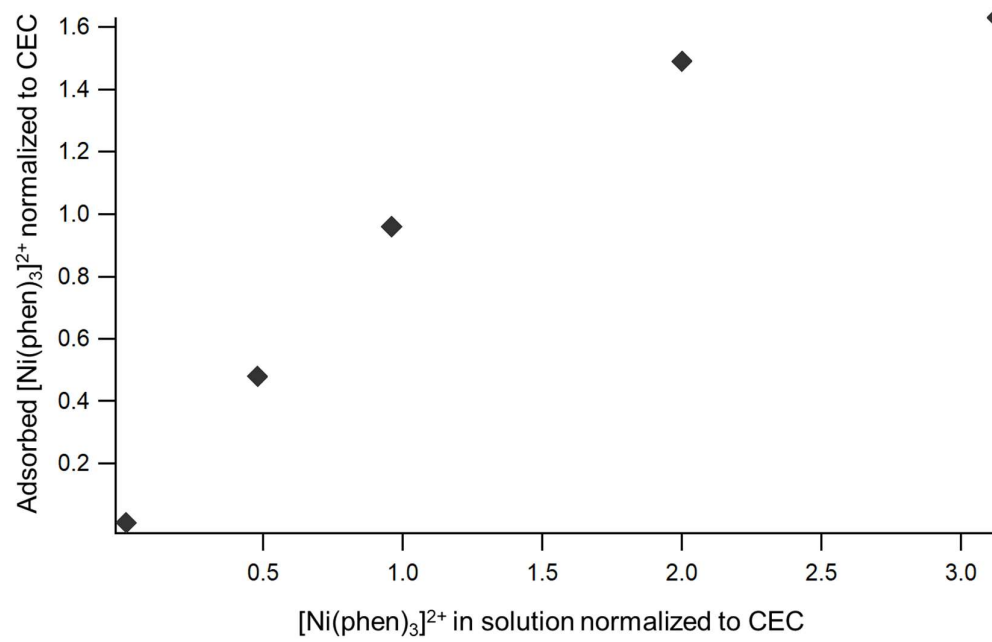

**Figure S1** Adsorption isotherm of [Ni(phen)<sub>3</sub>]Cl<sub>2</sub> on **Na-Mt**.

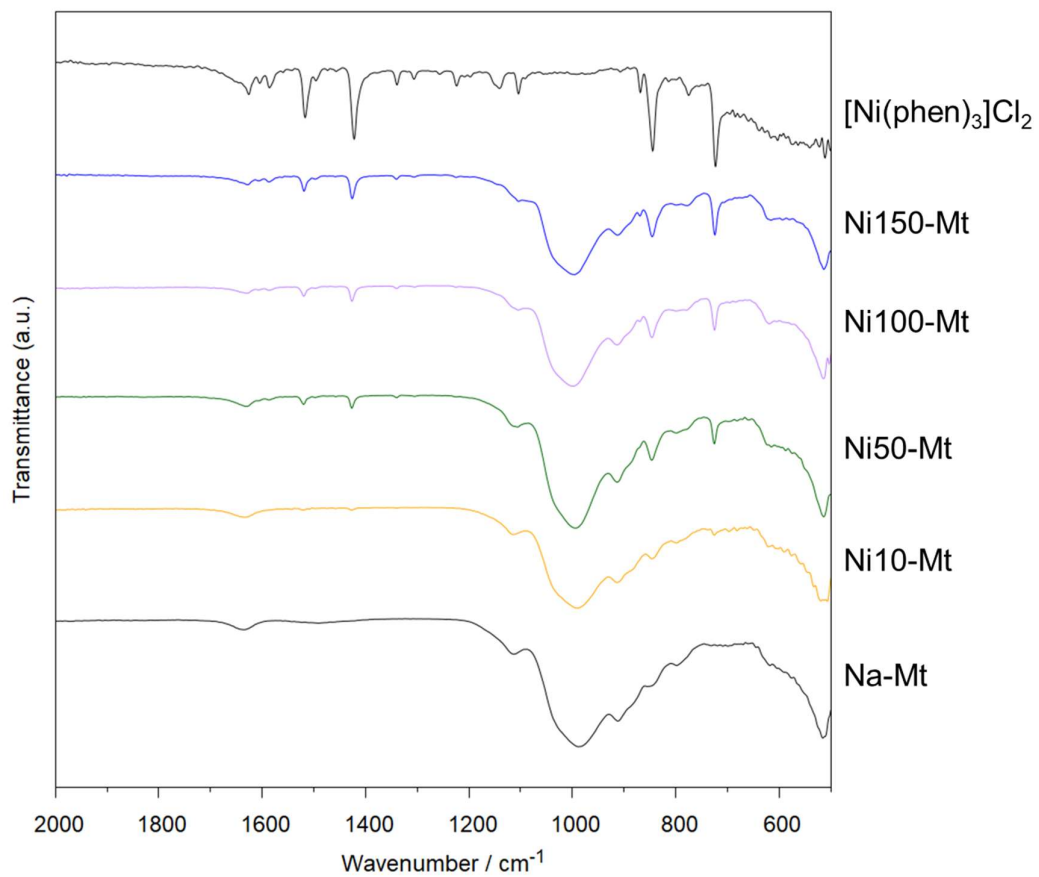

**Figure S2** ATR-IR spectra of Na-Mt, Ni10-Mt, Ni50-Mt, Ni100-Mt, Ni150-Mt, and [Ni(phen)<sub>3</sub>]Cl<sub>2</sub>.

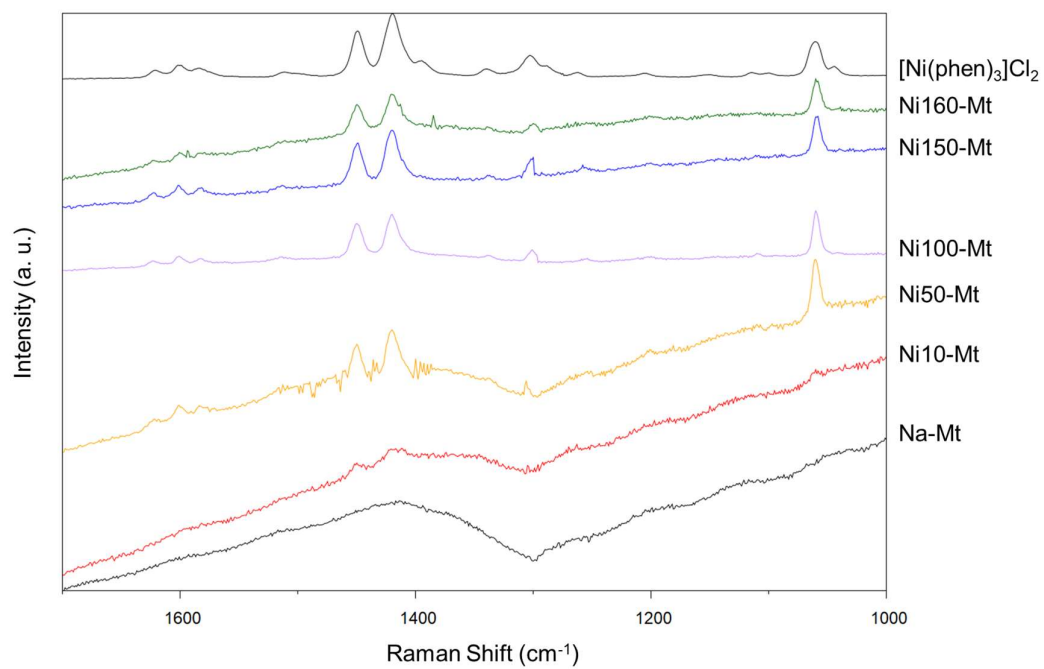

**Figure S3** Raman spectra of Na-Mt, Ni10-Mt, Ni50-Mt, Ni100-Mt, Ni150-Mt, Ni160-Mt, and [Ni(phen)<sub>3</sub>]Cl<sub>2</sub>. The wavelength of the laser used is 785 nm.

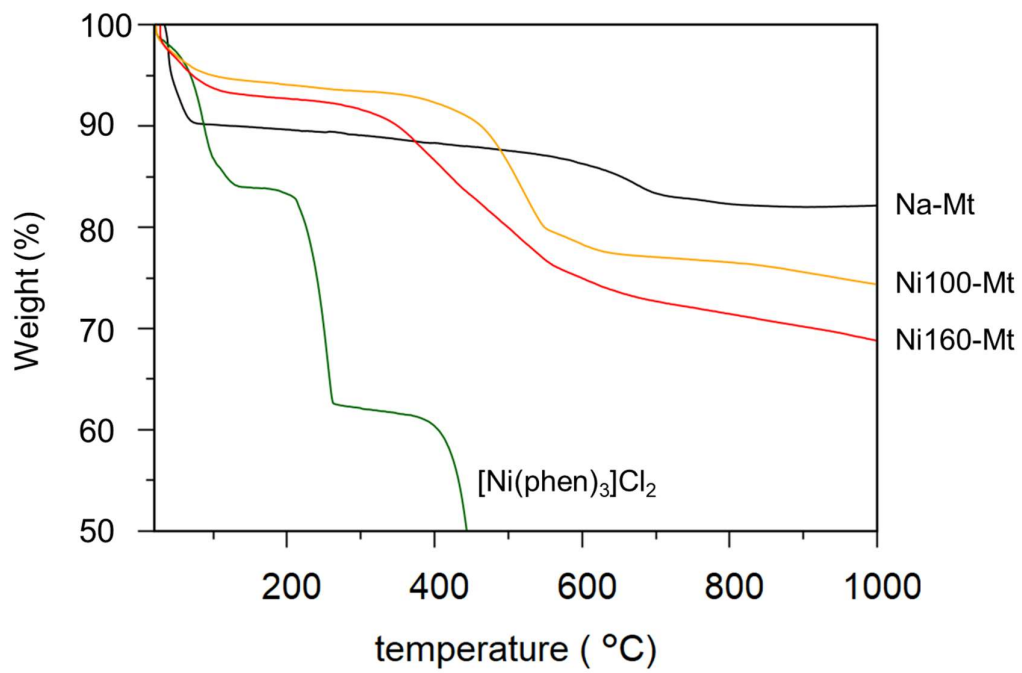

**Figure S4** TG curves of Na-Mt, Ni100-Mt, Ni160-Mt, and [Ni(phen)<sub>3</sub>]Cl<sub>2</sub>.

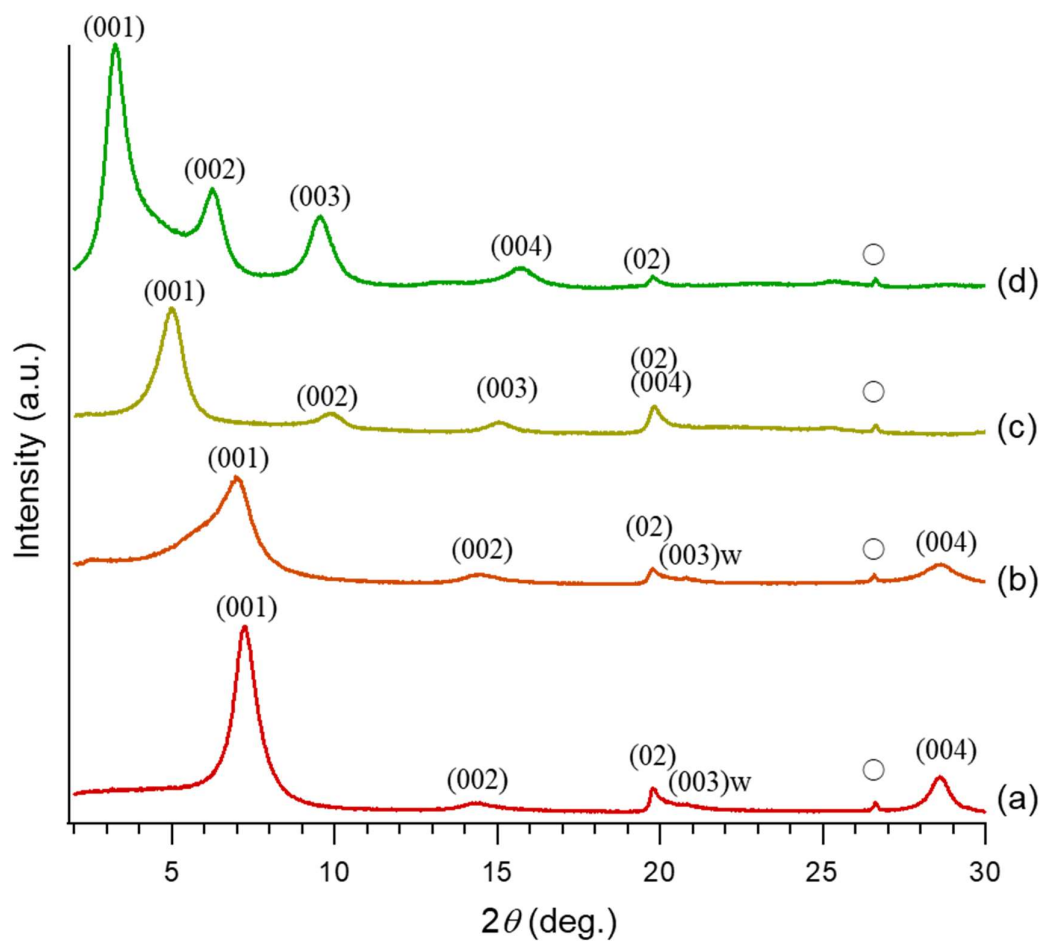

**Figure S5** Powder XRD patterns of (a) **Na-Mt**, (b) **Ni10-Mt**, (c) **Ni100-Mt**, and (d) **Ni160-Mt** measured in reflection mode with samples loaded on a glass plate. The reflections marked with circles are attributed to quartz included in **Na-Mt** as an impurity.

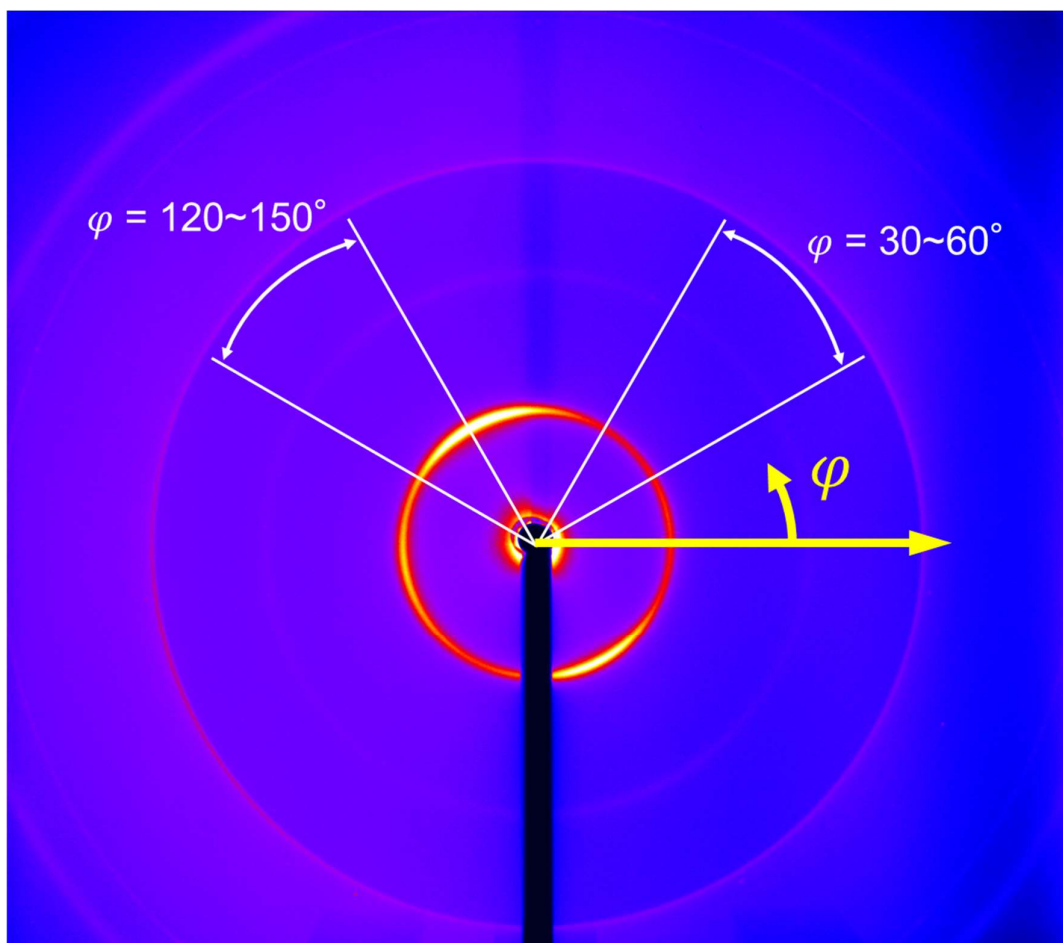

**Figure S6** 2D XRD image of Na-Mt measured in transmission mode.



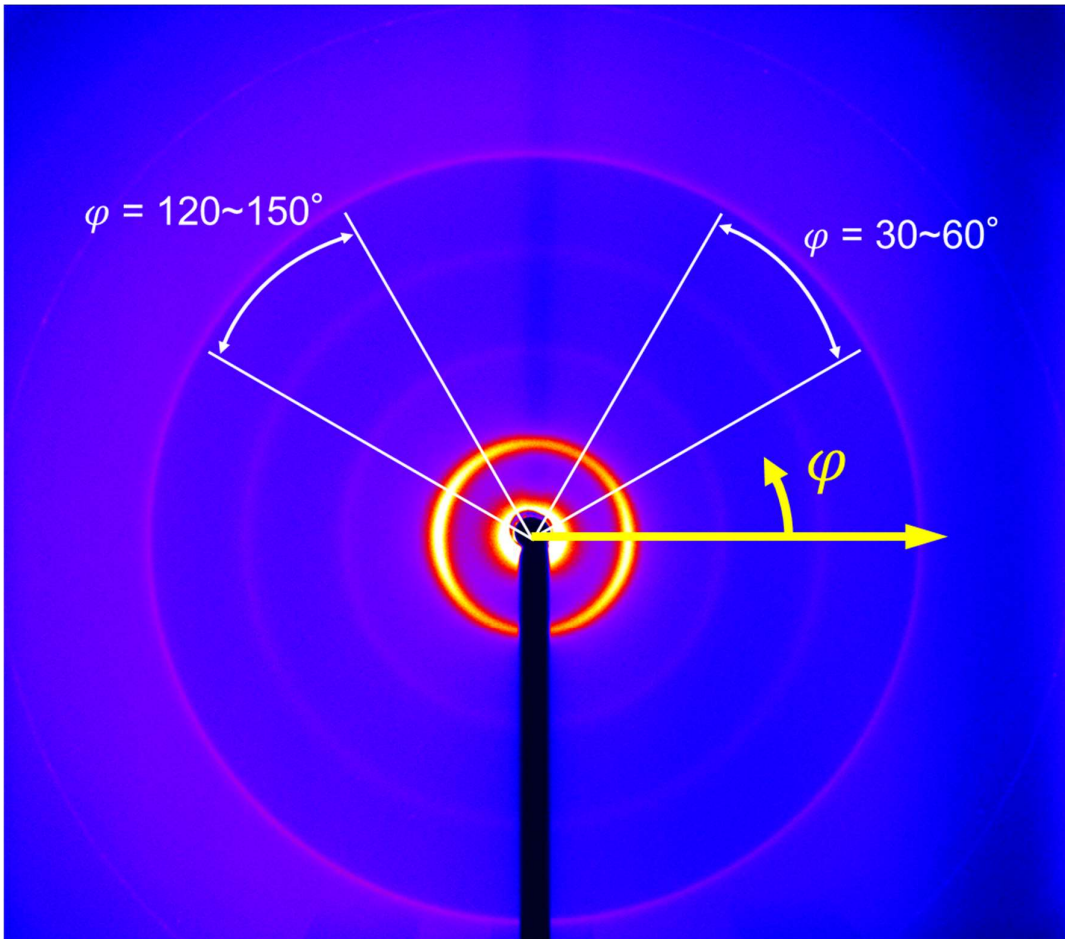

**Figure S7** 2D XRD image of Ni<sub>50</sub>-Mt measured in transmission mode.

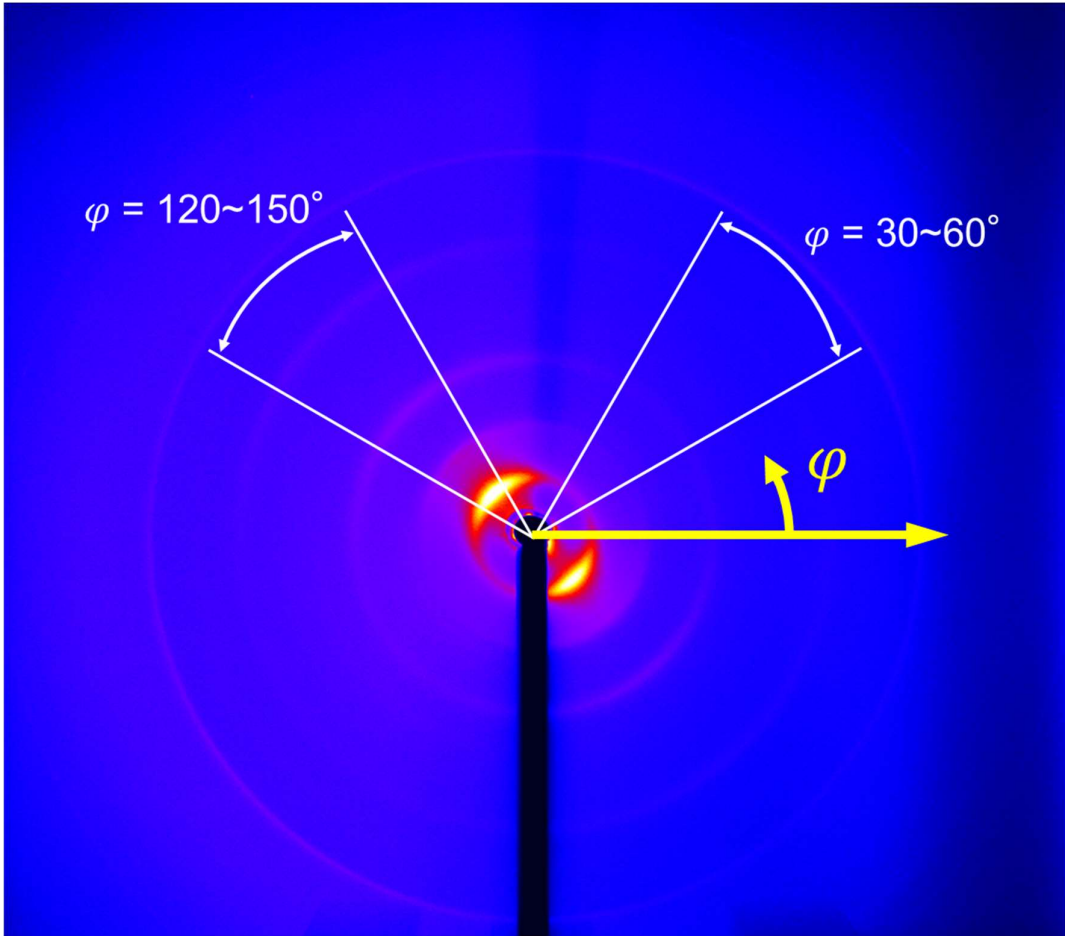

**Figure S8** 2D XRD image of Ni<sub>150</sub>-Mt measured in transmission mode.

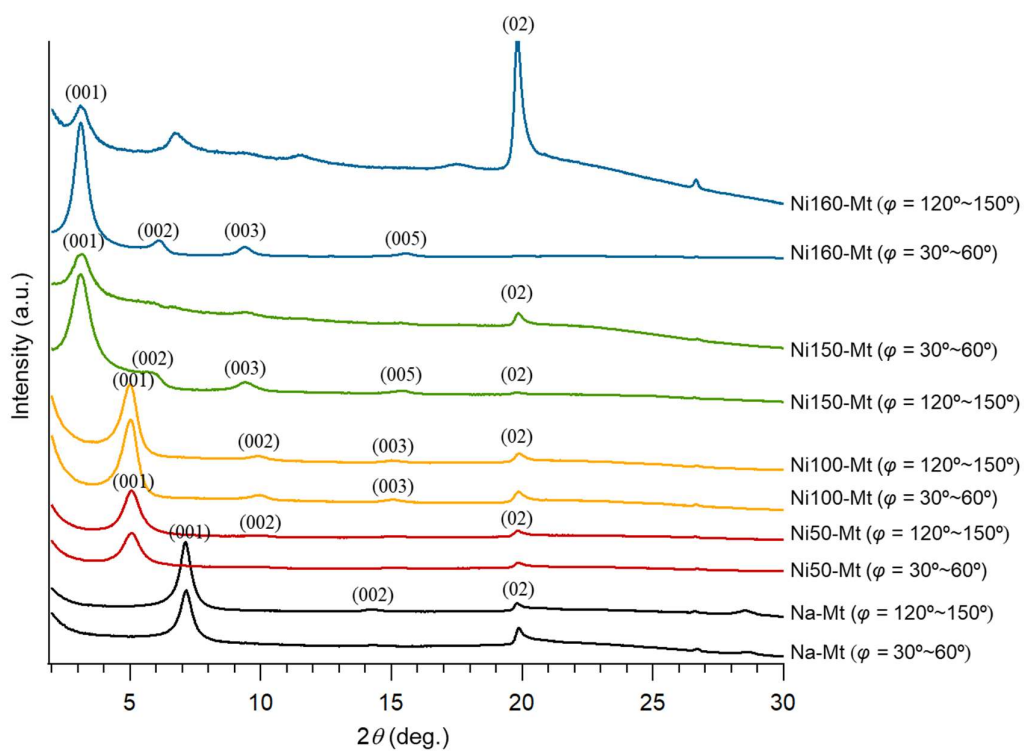

**Figure S9** 1D XRD patterns of **Na-Mt**, **Ni50-Mt**, **Ni100-Mt**, **Ni150-Mt**, and **Ni160-Mt**, which were deduced from the azimuthal integration of  $30^\circ \sim 60^\circ$  and  $120^\circ \sim 150^\circ$  regions in each 2D XRD image. Indices of the basal reflections are shown in black characters, while the reflections attributed to the (020) plane are marked with blue characters.

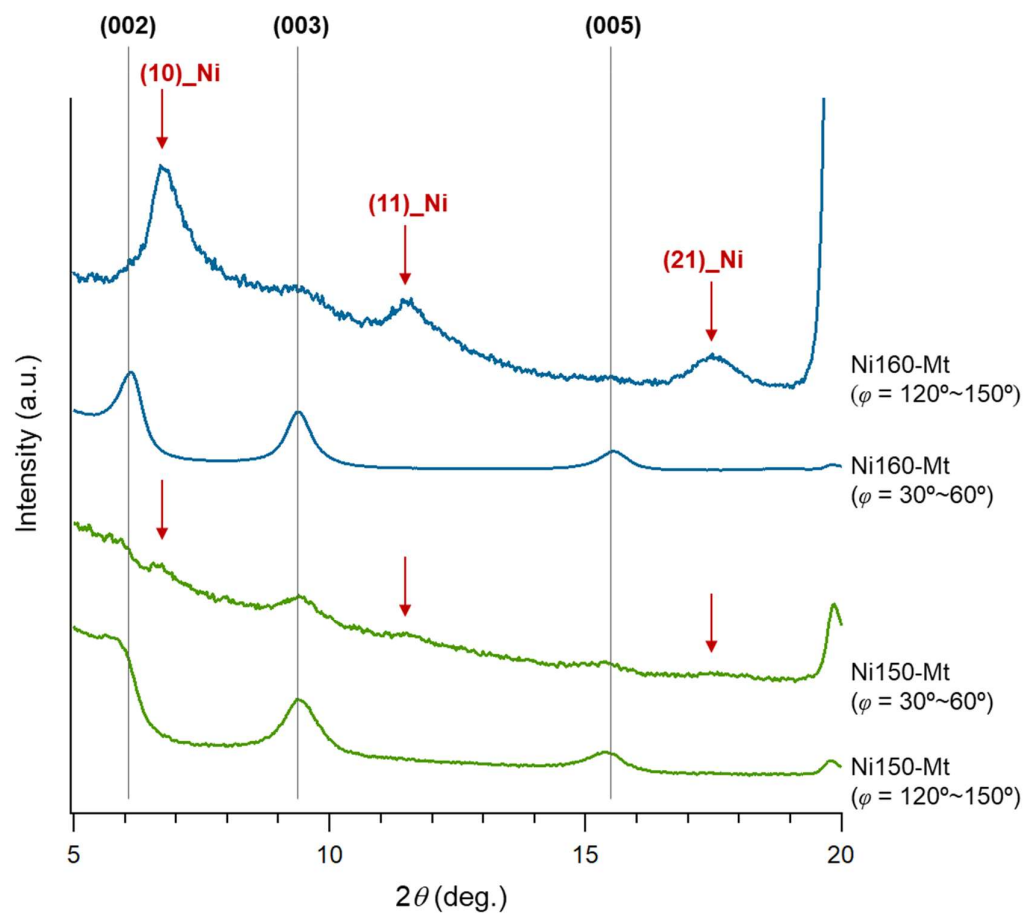

**Figure S10** Enlarged view of 1D XRD patterns of Ni150-Mt and Ni160-Mt, which were deduced from the azimuthal integration of  $30^\circ \sim 60^\circ$  and  $120^\circ \sim 150^\circ$  regions in each 2D XRD image. Indices of the reflections attributed to the host clay are shown in black characters, whereas those attributed to two-dimensional assembly of Ni complexes are shown in red characters and arrows.

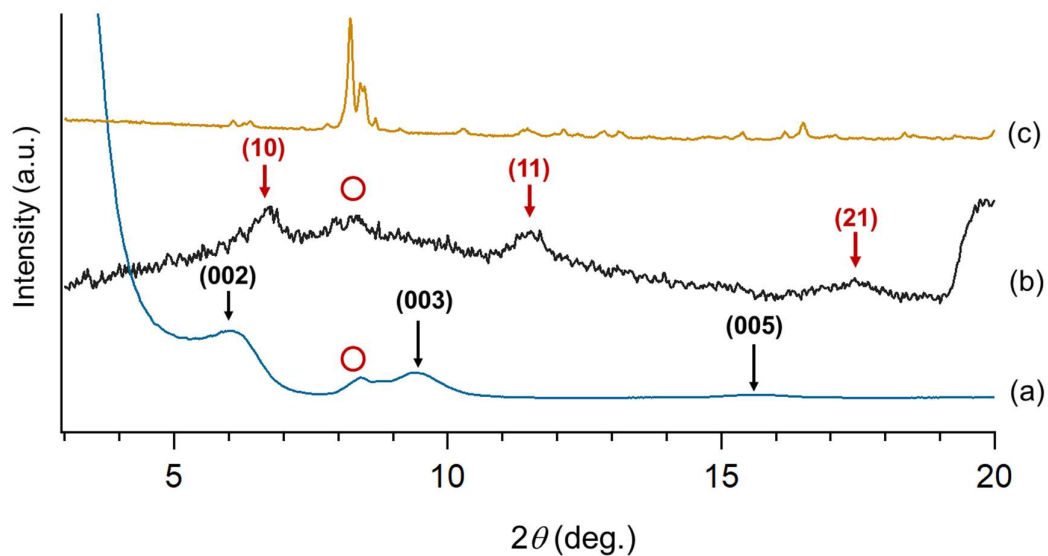

**Figure S11** 1D XRD patterns of **Ni160-Mt** derived from the GI-XRD image along (a) the meridional and (b) equatorial directions. (c) 1D XRD pattern of powder  $[\text{Ni}(\text{phen})_3]\text{Cl}_2$ . Indices of the reflections attributed to the host clay and guest Ni complexes are shown in black and red characters, respectively. The reflections attributed to  $[\text{Ni}(\text{phen})_3]\text{Cl}_2$  in **Ni160-Mt** are marked with red circles.

## Reference

- 1 G. B. Kauffman, L. T. Takahashi, K. H. Pearson, L. W. Sequin and S. Kirschner, *Inorg. Synth.*, 1966, 227–232.
